# Supplementary material for: Liver fibrosis screening increases alcohol abstinence
Source: PubMed Central journal article supplement — JHEP Rep. 2024 Jul 2;6(10):101165. doi: 10.1016/j.jhepr.2024.101165 (PMC11459648; doi:10.1016/j.jhepr.2024.101165), 2024-07-02
Supplement: mmc1.pdf [file mmc1.pdf]

# Liver fibrosis screening increases alcohol abstinence

Emma Avitabile, Jordi Gratacós-Ginès, Martina Pérez-Guasch, Ana Belén Rubio, Queralt Herms, Marta Cervera, Ruth Nadal, Marta Carol, Núria Fabrellas, Pol Bruguera, Ana Llorente, Lluisa Ortega, Anna Lligoña, Laura Nuño, Neus Freixa, María Teresa Pons, Alba Díaz, Ramon Bataller, Pere Ginès, Hugo López-Pelayo, Elisa Pose

## Table of contents

|               |   |
|---------------|---|
| Fig. S1.....  | 2 |
| Table S1..... | 3 |
| Table S2..... | 4 |
| Table S3..... | 5 |
| Table S4..... | 6 |
| Table S5..... | 7 |
| Table S6..... | 8 |

**Fig. S1. Changes in WHO drinking classes at 6 months follow-up in active alcohol consumers in the screening and the control cohorts**

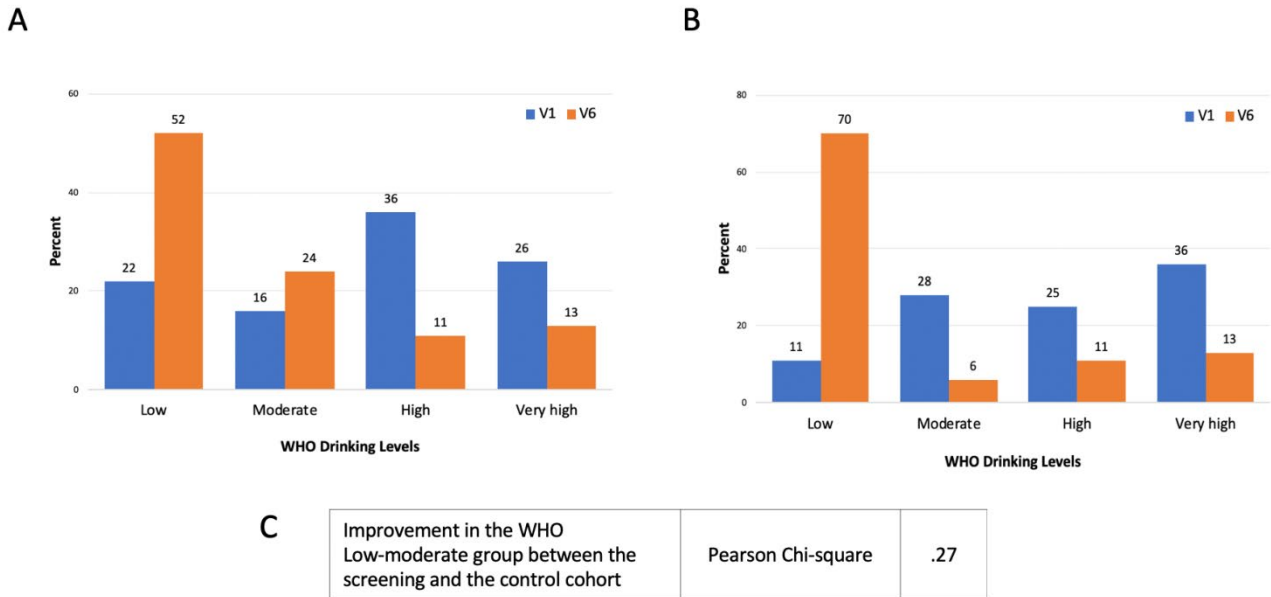

WHO, world health organization; V1, baseline visit in the liver unit; V6, follow-up visit at 6 months.

WHO drinking classes are described based on consumption of standard drinks (SD, 10 g of alcohol) per day or per week as follows: Low risk group, 0-4 SD/day or 0-28 SD/week; Moderate risk group, 4-6 SD/day or 28-42 SD/week; High risk group, 6-10 SD/day or 42-70 SD/week; Very-high risk group, >10 SD/day or >70 SD/week.

**A. Changes in WHO drinking classes in non-abstinent subjects of the screening cohort between baseline and follow-up at 6 months**

**B. Changes in WHO drinking classes in non-abstinent subjects of the control cohort between baseline and follow-up at 6 months**

**C. Comparison of the improvement in the WHO low-moderate group between the screening and the control cohort**

**Table S1. Baseline characteristics of the screening and control cohort**

|                                                               | <b>SCREENING<br/>COHORT<br/>(n=334)</b> | <b>CONTROL<br/>COHORT<br/>(n=137)</b> | <b>p</b>   |
|---------------------------------------------------------------|-----------------------------------------|---------------------------------------|------------|
| Age (years)                                                   | 51 (42-59)                              | 48 (40-59)                            | .14        |
| Gender (male)                                                 | 228 (68)                                | 83 (61)                               | .13        |
| Psychiatric comorbidity                                       | 159 (48)                                | 69 (50)                               | .61        |
| Tobacco consumption                                           | 192 (58)                                | 75 (55)                               | .61        |
| Illicit drugs (active)                                        | 89 (27)                                 | 48 (35)                               | .07        |
| Maximum Alcohol consumption<br>(SD/week)                      | 70 (47-105)                             | 70 (45-112)                           | .97        |
| <b>Alcohol consumption in the previous<br/>year (SD/week)</b> | <b>70 (42-98)</b>                       | <b>50 (35-84)</b>                     | <b>.04</b> |
| Duration of alcohol consumption<br>(years)                    | 20 (11-30)                              | 20 (9-30)                             | .28        |
| Alcohol Use Disorder medication (yes)                         | 89 (27)                                 | 25 (18)                               | .06        |

Values expressed as median or percentages

SD, standard drink of alcohol

**Table S2. Baseline characteristics of the pre-COVID and COVID group in the screening cohort**

|                                                    | <b>Pre-COVID<br/>(n=70)</b> | <b>Post-COVID<br/>(n=264)</b> | <b>p</b>   |
|----------------------------------------------------|-----------------------------|-------------------------------|------------|
| Age (years)                                        | 51 (41-60)                  | 51 (42-59)                    | .84        |
| Gender (male)                                      | 47 (67)                     | 181 (69)                      | .89        |
| Diabetes mellitus                                  | 7 (10)                      | 21 (8)                        | .63        |
| Arterial hypertension                              | 17 (24)                     | 56 (21)                       | .63        |
| BMI (kg/m <sup>2</sup> ) °                         | 25 (23-29)                  | 26 (22-29)                    | .94        |
| Metabolic syndrome *                               | 14 (20)                     | 59 (23)                       | .75        |
| Psychiatric comorbidity                            | 38 (54)                     | 121 (46)                      | .44        |
| Tobacco consumption                                | 38 (54)                     | 154 (58)                      | .59        |
| Illicit drugs (active)                             | 17 (24)                     | 72 (27)                       | .66        |
| <b>Maximum Alcohol consumption (SD/week)</b>       | <b>80 (56-140)</b>          | <b>70 (45-105)</b>            | <b>.05</b> |
| Alcohol consumption in the previous year (SD/week) | 70 (37-126)                 | 64 (41-84)                    | .18        |
| Duration of alcohol consumption (years)            | 22 (14-30)                  | 20 (10-31)                    | .50        |
| Alcohol Use Disorder medication (yes)              | 17 (24)                     | 72 (27)                       | .65        |
| AST (IU/L)                                         | 23 (18-34)                  | 24 (19-35)                    | .36        |
| ALT (IU/L)                                         | 25 (17-42)                  | 27 (18-44)                    | .85        |
| GGT (IU/L)                                         | 36 (22-63)                  | 33 (20-65)                    | .31        |
| Bilirubin (mg/dl)                                  | .5 (.4-.7)                  | .6 (.4-.8)                    | .06        |
| Alkaline phosphatase (IU/L)                        | 83 (69-99)                  | 76 (63-93)                    | .15        |
| Albumin (g/L)                                      | 46 (44-47)                  | 46 (44-48)                    | .36        |
| Sodium (mEq/L)                                     | 141 (139-144)               | 140 (139-141)                 | .07        |
| Platelets (10 <sup>9</sup> /ul)                    | 241 (201-303)               | 233 (196-274)                 | .28        |
| <b>AUDIT ^</b>                                     | <b>22 (16-28)</b>           | <b>19 (14-24)</b>             | <b>.02</b> |

Values expressed as median or percentages

BMI, body mass index; SD, standard drink of alcohol; AST, aspartate aminotransferase; ALT, alanine aminotransferase; GGT, gamma -glutamyl transpeptidase; AUDIT, Alcohol Use Disorder Identification Test.

° missing values n=80; \*missing values n=3; ^ missing values n=137

**Table S3. Baseline characteristics of subjects lost to follow-up and those completing the study**

|                                                       | <b>Lost to follow-up<br/>(n=80)</b> | <b>Completing the<br/>study (n=254)</b> | <b>p</b>    |
|-------------------------------------------------------|-------------------------------------|-----------------------------------------|-------------|
| <b>Age (years)</b>                                    | <b>47 (38-56)</b>                   | <b>51 (43-60)</b>                       | <b>.01</b>  |
| <b>Gender (male)</b>                                  | <b>63 (79)</b>                      | <b>165 (65)</b>                         | <b>.03</b>  |
| BMI (kg/m <sup>2</sup> ) °                            | 26 (23-29)                          | 25 (23-29)                              | .69         |
| Metabolic syndrome *                                  | 20 (25)                             | 53 (21)                                 | .44         |
| Psychiatric comorbidity                               | 38 (48)                             | 121 (48)                                | .53         |
| Tobacco consumption                                   | 47 (59)                             | 145 (57)                                | .90         |
| Illicit drugs (active)                                | 27 (34)                             | 62 (24)                                 | .11         |
| Maximum Alcohol consumption (SD/week)                 | 75 (56-130)                         | 70 (45-105)                             | .43         |
| Alcohol consumption in the previous year<br>(SD/week) | 70 (42-89)                          | 70 (42-98)                              | .89         |
| Duration of alcohol consumption (years)               | 20 (9-29)                           | 22 (11-31)                              | .09         |
| Alcohol Use Disorder medication (yes)                 | 19 (24)                             | 70 (28)                                 | .56         |
| AUDIT ^                                               | 20 (15-24)                          | 20 (14-25)                              | .91         |
| AST (IU/L)                                            | 24 (20-67)                          | 24 (19-32)                              | .21         |
| ALT (IU/L)                                            | 28 (20-47)                          | 26 (17-42)                              | .10         |
| GGT (IU/L)                                            | 37 (22-73)                          | 32 (20-60)                              | .11         |
| Bilirubin (mg/dl)                                     | .6 (.4-.8)                          | .6 (.4-.7)                              | .59         |
| <b>Albumin (g/L)</b>                                  | <b>46 (44-49)</b>                   | <b>45 (44-47)</b>                       | <b>.001</b> |
| Platelets (10 <sup>9</sup> /ul)                       | 241 (200-281)                       | 232 (197-278)                           | .57         |

Values expressed as median or percentages

BMI, body mass index; SD, standard drink of alcohol; AST, aspartate aminotransferase; ALT, alanine aminotransferase; GGT, gamma -glutamyl transpeptidase; AUDIT, Alcohol Use Disorder Identification Test.

° missing values n=80; \*missing values n=3; ^ missing values n=137

**Table S4. Subanalysis of pre-COVID and COVID eras**

**A – Cross table of abstinence at 6 months in pre-COVID and COVID cohorts**

| <b>p=.02*</b>                 |            | <b>Pre-COVID<br/>(n=70)</b> | <b>COVID<br/>(n=264)</b> | <b>Total</b> |
|-------------------------------|------------|-----------------------------|--------------------------|--------------|
| <b>Abstinence at 6 months</b> | <b>no</b>  | 30 (43)                     | 155 (59)                 | 185 (55)     |
|                               | <b>yes</b> | 40 (57)                     | 109 (41)                 | 149 (45)     |
| <b>Total</b>                  |            | 70 (100)                    | 264 (100)                | 334 (100)    |

Values expressed as numbers and percentages

\*p calculated by Pearson Chi-Square test

**B – Univariate and Multivariate Logistic Regression analysis of factors associated with abstinence at 6 months**

| <b>VARIABLES</b>                             | <b>UNIVARIATE ANALYSIS</b> |             |                  | <b>MULTVARIATE ANALYSIS</b> |             |                   |
|----------------------------------------------|----------------------------|-------------|------------------|-----------------------------|-------------|-------------------|
|                                              | <b>p</b>                   | <b>OR</b>   | <b>95%CI</b>     | <b>p</b>                    | <b>OR</b>   | <b>95%CI</b>      |
| <b>Age (years)</b>                           | <b>.04</b>                 | <b>1.02</b> | <b>.99-1.04</b>  | <b>.01</b>                  | <b>1.03</b> | <b>1.01-1.05</b>  |
| <b>Alcohol Use Disorder Medication (yes)</b> | <b>.01</b>                 | <b>1.65</b> | <b>1.11-2.44</b> | <b>.01</b>                  | <b>2.00</b> | <b>1.18-.3.38</b> |
| GGT (U/L)                                    | .04                        | .99         | .99-1.00         |                             |             |                   |
| AP (U/L)                                     | <b>.03</b>                 | <b>.99</b>  | <b>.98-.99</b>   | <b>.01</b>                  | <b>.99</b>  | <b>.98-.99</b>    |
| Albumin (g/L)                                | .01                        | .90         | .83-.97          |                             |             |                   |
| Sodium (mEq/L)                               | .05                        | 1.10        | 1.00-1.20        | .08                         | 1.09        | .99-1.20          |
| <b>Total Cholesterol (mg/dl)</b>             | <b>.01</b>                 | <b>.99</b>  | <b>.98-.99</b>   | <b>.003</b>                 | <b>.99</b>  | <b>.98-.99</b>    |
| <b>COVID era</b>                             | <b>.02</b>                 | <b>.53</b>  | <b>.31-.90</b>   | <b>.03</b>                  | <b>.53</b>  | <b>.30-.93</b>    |

Pre-COVID era: from the 1st of July 2019 to the 14th of March of 2020 (starting of lock-down in Spain)

COVID era: from March 15th 2020 until the 31st December 2022 (end of the study).

GGT, gamma -glutamyl transpeptidase; AP, alkaline phosphatase.

**Table S5. Factors associated with alcohol abstinence in the screening and control cohorts**

**A- Baseline Characteristics between subjects who were active consumers and abstinent subjects at 6 months follow-up**

| <b>VARIABLES</b>                        | <b>Active consumption (n=282)</b> | <b>Abstinence* (n=189)</b> | <b>p</b>        |
|-----------------------------------------|-----------------------------------|----------------------------|-----------------|
| <b>Group (screening cohort)</b>         | <b>185 (66)</b>                   | <b>149 (79)</b>            | <b>.002</b>     |
| <b>Age (years)</b>                      | <b>48 (41-58)</b>                 | <b>52 (44-60)</b>          | <b>.004</b>     |
| Gender (male)                           | 188 (67)                          | 123 (65)                   | .77             |
| Tobacco consumption                     | 153 (54)                          | 114 (60)                   | .22             |
| <b>Illicit drugs (active)</b>           | <b>101 (36)</b>                   | <b>36 (19)</b>             | <b>&lt;.001</b> |
| Maximum Alcohol consumption (SD/week)   | 70 (49-105)                       | 77 (45-117)                | .36             |
| Duration of alcohol consumption (years) | 20 (10-30)                        | 20 (10-31)                 | .33             |
| <b>Alcohol Use Disorder medication</b>  | <b>57 (20)</b>                    | <b>57 (30)</b>             | <b>.02</b>      |

**B- Univariate and Multivariate logistic regression analysis<sup>o</sup>**

| <b>VARIABLES</b>                       | <b>UNIVARIATE ANALYSIS</b> |             |                  | <b>MULTIVARIATE ANALYSIS</b> |             |                  |
|----------------------------------------|----------------------------|-------------|------------------|------------------------------|-------------|------------------|
|                                        | <b>P</b>                   | <b>OR</b>   | <b>95%CI</b>     | <b>p</b>                     | <b>OR</b>   | <b>95%CI</b>     |
| <b>Group (screening cohort)</b>        | <b>.002</b>                | <b>1.95</b> | <b>1.28-2.99</b> | <b>.01</b>                   | <b>1.77</b> | <b>1.14-2.74</b> |
| <b>Age (years)</b>                     | <b>.003</b>                | <b>1.02</b> | <b>1.01-1.04</b> | <b>.09</b>                   | <b>1.02</b> | <b>.99-1.03</b>  |
| <b>Illicit drugs (active)</b>          | <b>&lt;.001</b>            | <b>.42</b>  | <b>.27-.65</b>   | <b>.004</b>                  | <b>.50</b>  | <b>.31-.81</b>   |
| <b>Alcohol Use Disorder medication</b> | <b>.01</b>                 | <b>1.71</b> | <b>1.11-2.61</b> | <b>.02</b>                   | <b>1.72</b> | <b>1.11-2.67</b> |

SD, standard drink of alcohol

\*Abstinence was defined as total abstinence for at least 3 consecutive months before the 6 months follow-up visit

<sup>o</sup>The table shows only factors with p<.05 at binary logistic regression. Multivariate logistic regression analysis performed by backward stepwise method (Wald).

**Table S6. Sensitivity analysis of liver stiffness values based on AST/bilirubin values**

**A- Cross table of increased LSM among the different AST/bilirubin groups, based on the LSM cut-offs described by Nguyen-Khac**

| <b>GROUPS</b>                                                                                      | <b>LSM cut-offs corresponding to Liver fibrosis &lt; 2*</b> | <b>LSM cut-offs corresponding to Liver fibrosis ≥ 2*</b> | <b>Total</b> |
|----------------------------------------------------------------------------------------------------|-------------------------------------------------------------|----------------------------------------------------------|--------------|
| <b>1st:</b> AST <38.7 IU/L and bilirubin <.53 mg/dl                                                | 71 (27%)                                                    | 6 (23%)                                                  | 77 (27%)     |
| <b>2nd:</b> AST 38.7-75 IU/L and bilirubin < 53 mg/dl or AST<38.7 IU/L and bilirubin .53-.94 mg/dl | 157 (61%)                                                   | 15 (58%)                                                 | 172 (60%)    |
| <b>3rd:</b> AST 38.7-75 IU/L and bilirubin .53-.94 mg/dl                                           | 25 (10%)                                                    | 4 (15%)                                                  | 29 (10%)     |
| <b>4th:</b> AST>75 IU/L and bilirubin >.94 mg/dl                                                   | 6 (2%)                                                      | 1 (4%)                                                   | 7 (3%)       |
| <b>Total</b>                                                                                       | 259 (100%)                                                  | 26 (100%)                                                | 285 (100%)   |

**B- Cross table of increased LSM among the different AST/bilirubin groups, based on the classical cut-off of LSM ≥ 8 kPa**

| <b>GROUPS</b>                                                                                      | <b>LSM &lt;8 kPa</b> | <b>LSM ≥ 8 kPa</b> | <b>Total</b> |
|----------------------------------------------------------------------------------------------------|----------------------|--------------------|--------------|
| <b>1st:</b> AST <38.7 IU/L and bilirubin <.53 mg/dl                                                | 75 (29%)             | 2 (8%)             | 77 (27%)     |
| <b>2nd:</b> AST 38.7-75 IU/L and bilirubin < 53 mg/dl or AST<38.7 IU/L and bilirubin .53-.94 mg/dl | 157 (60%)            | 15 (60%)           | 172 (60%)    |
| <b>3rd:</b> AST 38.7-75 IU/L and bilirubin .53-.94 mg/dl                                           | 23 (9%)              | 6 (24%)            | 29 (10%)     |
| <b>4th:</b> AST>75 IU/L and bilirubin >.94 mg/dl                                                   | 5 (2%)               | 2 (8%)             | 7 (3%)       |
| <b>Total</b>                                                                                       | 260 (100%)           | 25 (100%)          | 285 (100%)   |

**C- Correlation between LSM≥ 8 kPa and LSM cut-offs corresponding to Liver fibrosis ≥ 2 in the metanalysis**

| <b>Test</b>  | <b>p</b> |
|--------------|----------|
| McNemar Test | 1.00     |

LSM, liver stiffness measurement; AST, aspartate aminotransferase;

\* The liver stiffness cut-offs described in the Nguyen-Khac metanalysis corresponding to liver fibrosis ≥ 2 for each group were used: LSM≥ 6.9 kPa for the 1<sup>st</sup> group; LSM≥ 8.1 kPa for the 2<sup>nd</sup> group; LSM≥ 8.8 kPa for the 3<sup>rd</sup> group and LSM≥11.6 kPa for 4th group.
